# Supplementary material
Source: ML conference proceedings conference paper supplement (https://openaccess.thecvf.com/content/ICCV2025/html/Wang_Outlier-Aware_Post-Training_Quantization_ICCV_2025_paper.html)
Supplement: Supplementary file 1 [file Wang_Outlier-Aware_Post-Training_Quantization_ICCV_2025_supplemental.pdf]

# Supplementary Material for “Outlier-Aware Post-Training Quantization for Image Super-Resolution”

Hailing Wang Jianglin Lu Yitian Zhang Yun Fu

Northeastern University, USA

{wang.haili, lu.jiang}@northeastern.edu, markcheung9248@gmail.com, yunfu@ece.neu.edu

## 1. PTQ for SRResNet

We further extend the comparison with PTQ methods using the SRResNet network. The results, presented in Table 1, show that our method consistently achieves the best performance across all datasets and settings.

| Method                  | FT | W / A | Set5         |              | Set14        |              | BSD100       |              | Urban100     |              |
|-------------------------|----|-------|--------------|--------------|--------------|--------------|--------------|--------------|--------------|--------------|
|                         |    |       | PSNR         | SSIM         | PSNR         | SSIM         | PSNR         | SSIM         | PSNR         | SSIM         |
| SRResNet [4]            | -  | 32/32 | 32.06        | 0.892        | 28.50        | 0.779        | 27.52        | 0.735        | 25.86        | 0.779        |
| SRResNet-MSE [1]        | ×  | 6 / 6 | 31.40        | 0.885        | 27.93        | 0.770        | 27.07        | 0.727        | 25.40        | 0.766        |
| SRResNet-MinMax [3]     | ×  | 6 / 6 | 31.75        | 0.883        | 28.27        | 0.769        | 27.32        | 0.726        | 25.59        | 0.765        |
| SRResNet-Percentile [5] | ×  | 6 / 6 | 19.60        | 0.803        | 19.07        | 0.693        | 20.30        | 0.676        | 17.40        | 0.682        |
| SRResNet-PTQ4SR [6]     | ✓  | 6 / 6 | 31.79        | 0.885        | 28.35        | 0.773        | 27.40        | 0.729        | 25.66        | 0.768        |
| SRResNet-AdaBM [2]      | ✓  | 6 / 6 | 31.79        | 0.885        | 28.37        | 0.773        | 27.41        | 0.729        | 25.68        | 0.769        |
| SRResNet-Ours           | ✓  | 6 / 6 | <b>31.91</b> | <b>0.888</b> | <b>28.42</b> | <b>0.775</b> | <b>27.45</b> | <b>0.731</b> | <b>25.71</b> | <b>0.772</b> |
| SRResNet-MSE [1]        | ×  | 4 / 4 | 25.07        | 0.820        | 23.99        | 0.704        | 24.10        | 0.669        | 21.42        | 0.681        |
| SRResNet-MinMax [3]     | ×  | 4 / 4 | 28.78        | 0.819        | 26.51        | 0.708        | 26.09        | 0.666        | 23.77        | 0.679        |
| SRResNet-Percentile [5] | ×  | 4 / 4 | 19.47        | 0.774        | 19.03        | 0.662        | 20.19        | 0.642        | 17.28        | 0.637        |
| SRResNet-PTQ4SR [6]     | ✓  | 4 / 4 | 31.08        | 0.868        | 27.96        | 0.757        | 27.06        | 0.711        | 25.06        | 0.739        |
| SRResNet-AdaBM [2]      | ✓  | 4 / 4 | 31.43        | 0.877        | 28.04        | 0.763        | 27.16        | 0.718        | 25.24        | 0.749        |
| SRResNet-Ours           | ✓  | 4 / 4 | <b>31.47</b> | <b>0.880</b> | <b>28.16</b> | <b>0.767</b> | <b>27.25</b> | <b>0.722</b> | <b>25.33</b> | <b>0.754</b> |

Table 1. Performance comparison between PTQ methods using SRResNet, with a scale factor of 4.

## 2. Additional qualitative results

We provide additional visual comparisons of PTQ methods using EDSR and SRResNet networks in Figures 1 and 2. The results demonstrate that our method achieves performance comparable to that of a full-precision model. For EDSR, as shown in Figure 1, our method effectively preserves details while maintaining robustness to noise. For SRResNet, as illustrated in Figure 2, both PTQ4SR [6] and AdaBM [2] introduce noticeable noise, particularly on regions such as the white wall in the first row. In contrast, our method effectively suppresses noise while maintaining high visual fidelity.

## References

- [1] Jungwook Choi, Pierce I-Jen Chuang, Zhuo Wang, Swagath Venkataramani, Vijayalakshmi Srinivasan, and Kailash Gopalakrishnan. Bridging the accuracy gap for 2-bit quantized neural networks (qnn). *arXiv*, 2018. 1
- [2] Cheeun Hong and Kyoung Mu Lee. Adabm: On-the-fly adaptive bit mapping for image super-resolution. In *CVPR*, pages 2641–2650, 2024. 1

- [3] Benoit Jacob, Skirmantas Kligys, Bo Chen, Menglong Zhu, Matthew Tang, Andrew Howard, Hartwig Adam, and Dmitry Kalenichenko. Quantization and training of neural networks for efficient integer-arithmetic-only inference. In *CVPR*, pages 2704–2713, 2018. 1
- [4] Christian Ledig, Lucas Theis, Ferenc Huszár, Jose Caballero, Andrew Cunningham, Alejandro Acosta, Andrew Aitken, Alykhan Tejani, Johannes Totz, Zehan Wang, et al. Photo-realistic single image super-resolution using a generative adversarial network. In *CVPR*, pages 4681–4690, 2017. 1
- [5] Rundong Li, Yan Wang, Feng Liang, Hongwei Qin, Junjie Yan, and Rui Fan. Fully quantized network for object detection. In *CVPR*, pages 2810–2819, 2019. 1
- [6] Zhijun Tu, Jie Hu, Hanting Chen, and Yunhe Wang. Toward accurate post-training quantization for image super resolution. In *CVPR*, pages 5856–5865, 2023. 1

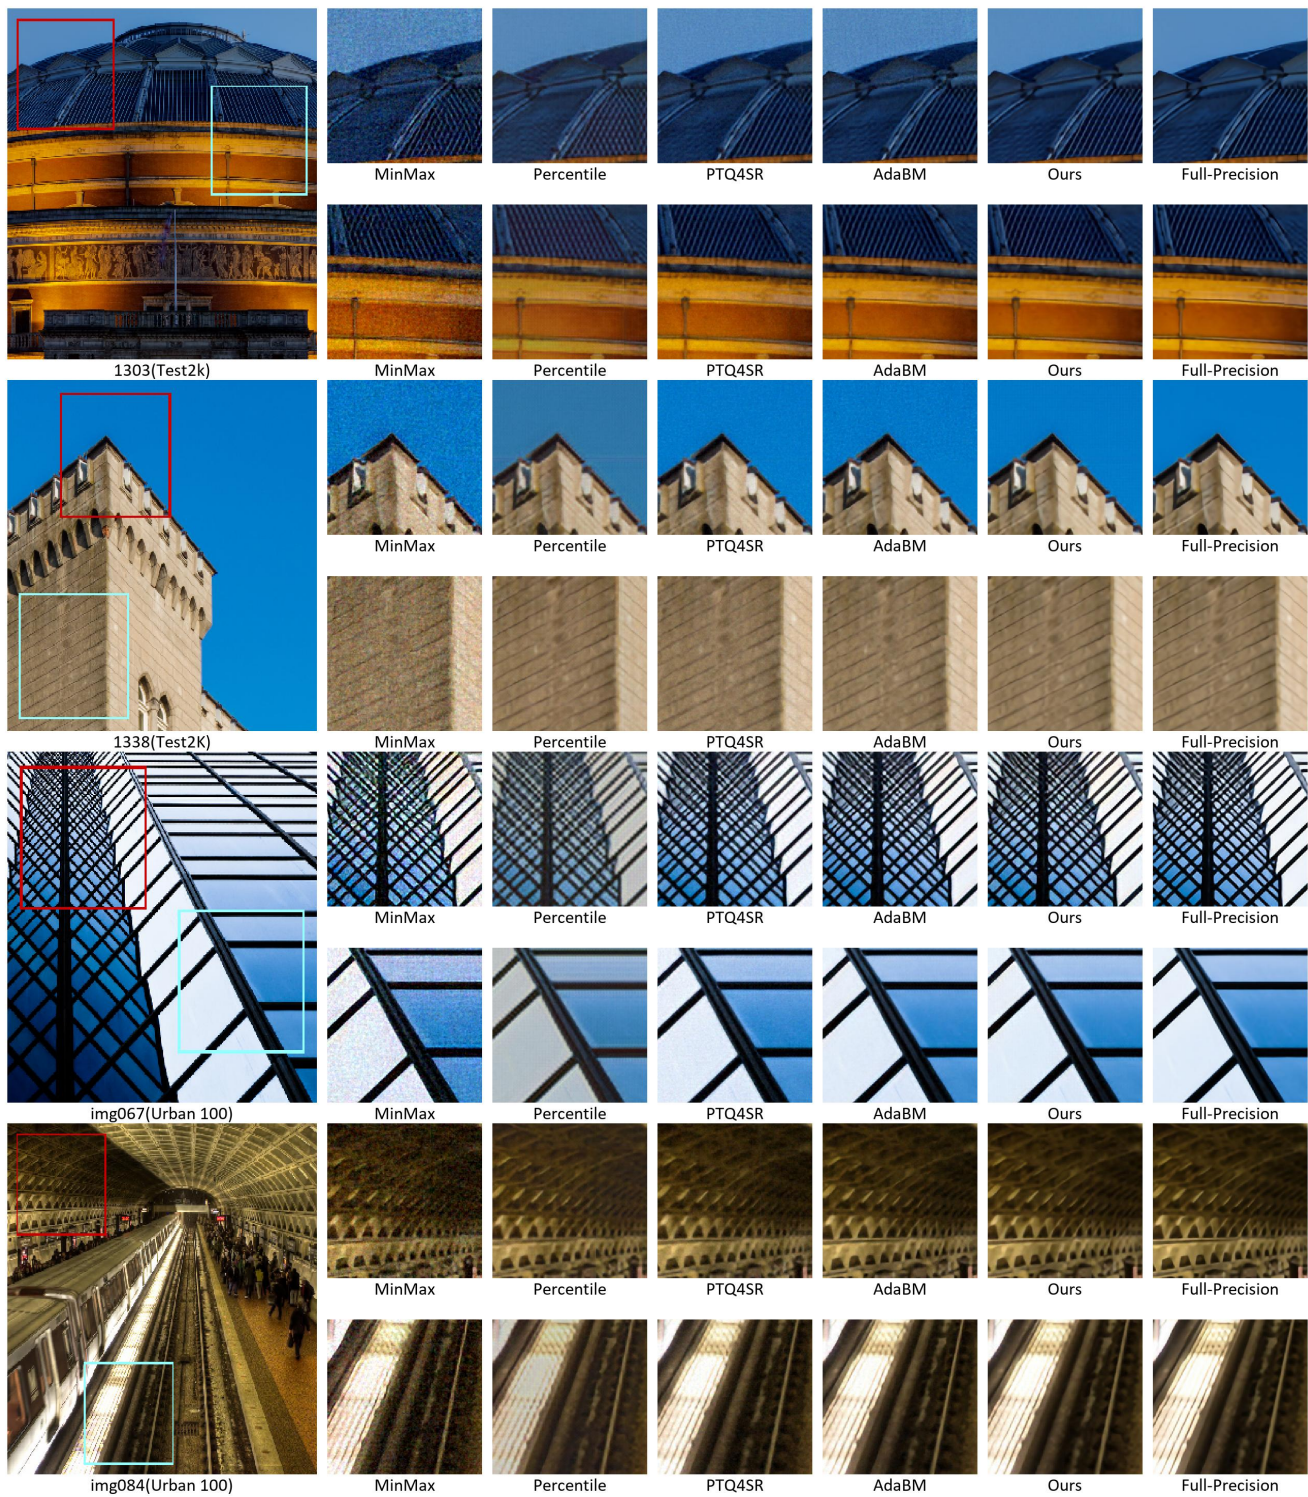

Figure 1. Visual comparison between different PTQ methods with the EDSR network under W4A4 setting.



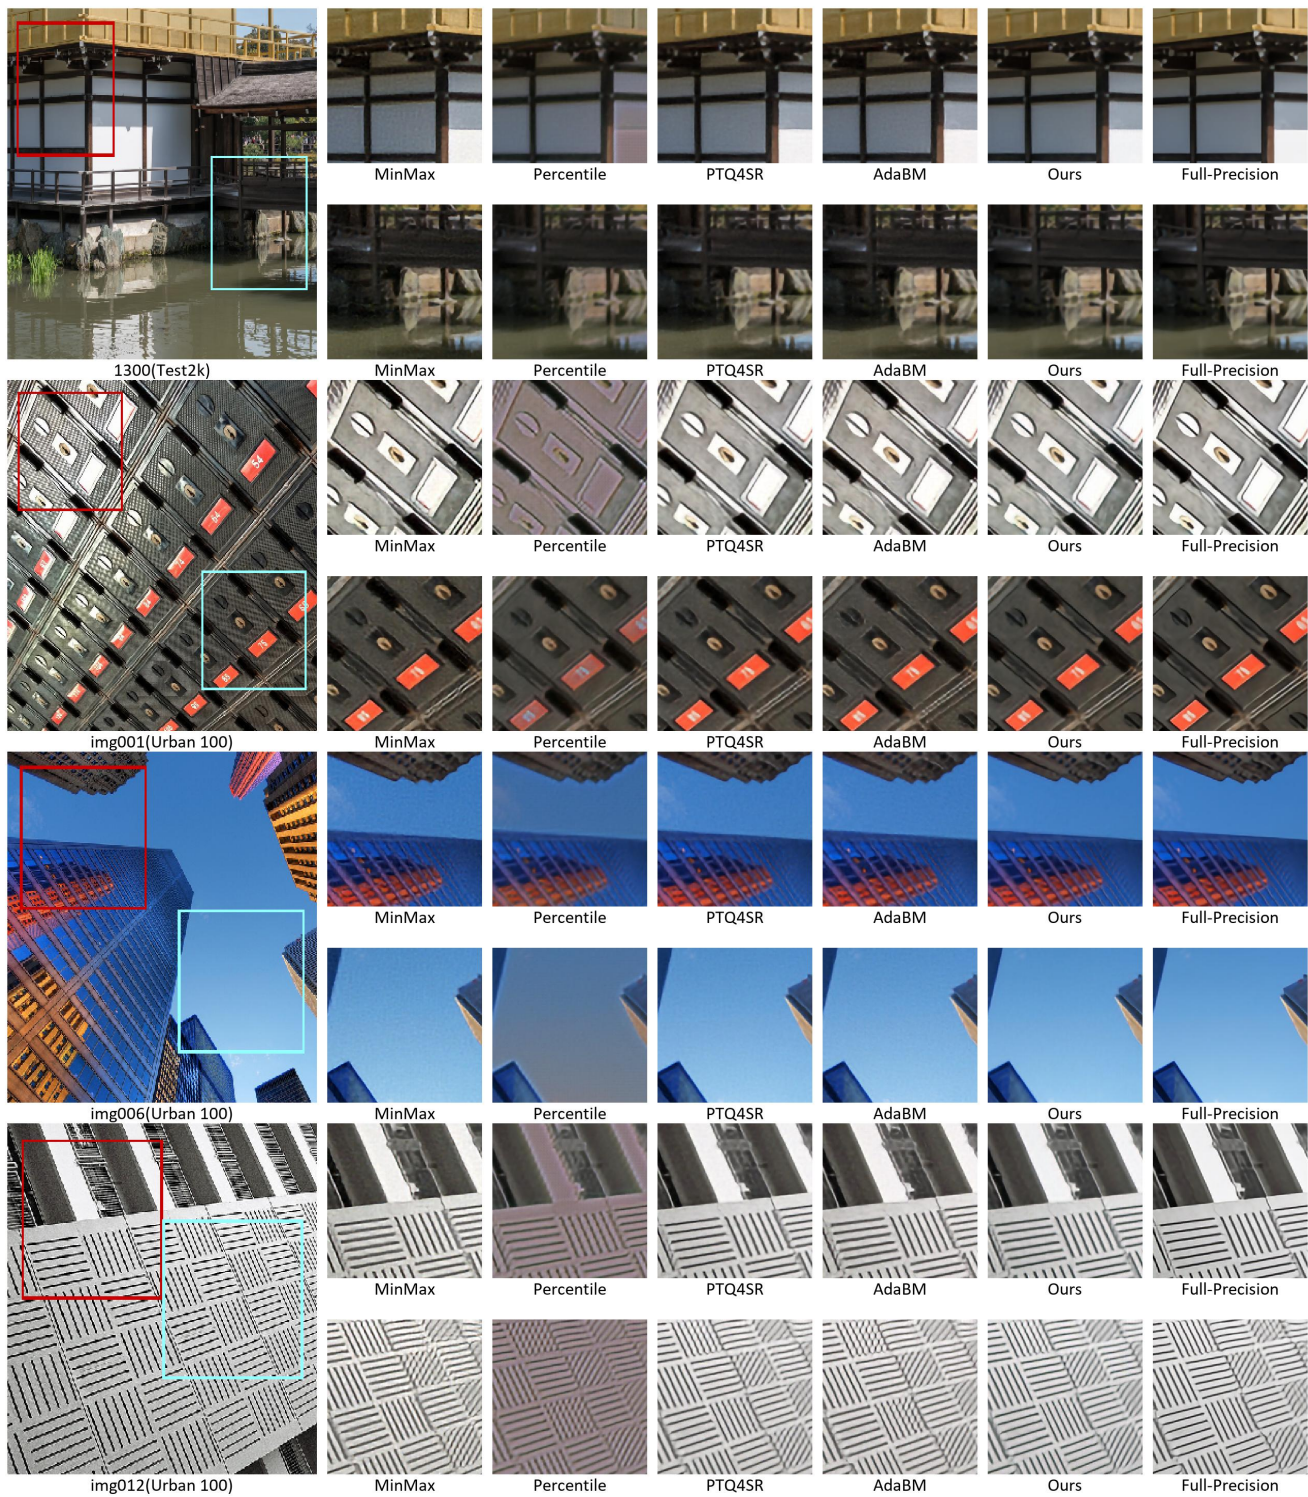

Figure 2. Visual comparison between different PTQ methods with the SRResNet network under W4A4 setting.
